# Supplementary material
Source: Springer Nature journal article supplement (https://www.springermedizin.de/resource/supplementary/13075_2013_4016_MOESM3_ESM.pdf/9695888)
Supplement: MOESM3 [file 9695888]

(a)

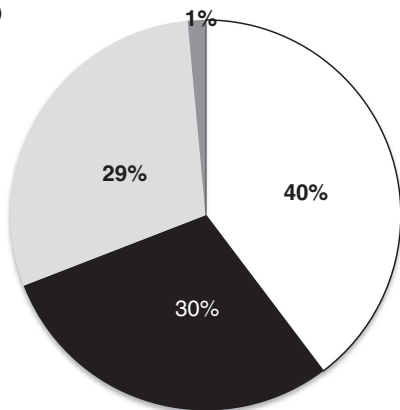

□ Sustained normotension

■ Sustained hypertension

□ White coat hypertension phenomenon

■ Masked hypertension phenomenon

(b)

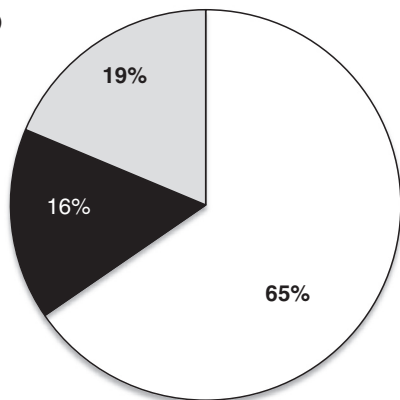

□ Sustained normotension

■ Sustained hypertension

□ White coat hypertension phenomenon
